# Supplementary material
Source: Springer Nature journal article supplement (https://www.springermedizin.de/resource/supplementary/12879_2010_1272_MOESM1_ESM.pdf/9442234)

**M****1****2****3****4**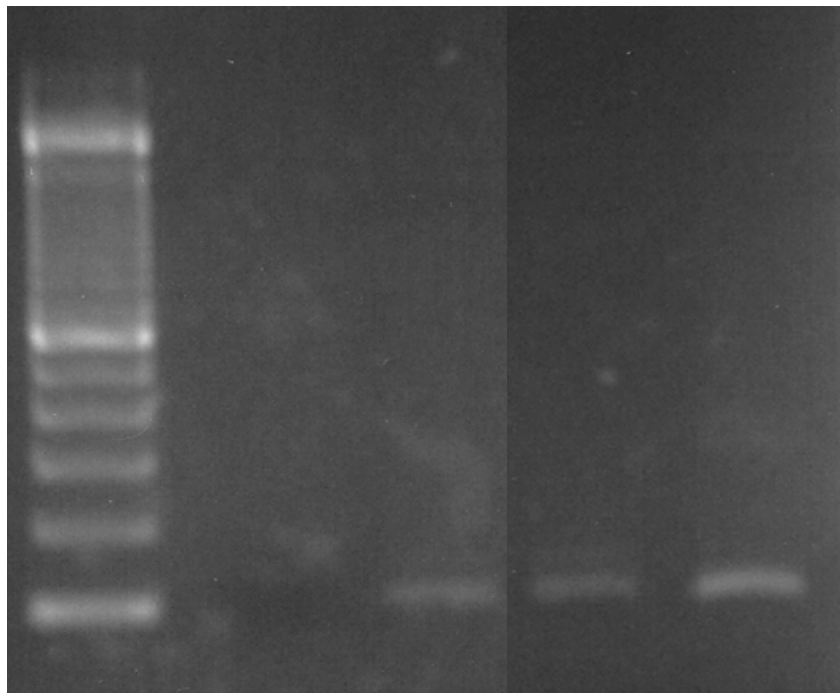

600 -

200 -

100 -

Supplement: MOESM1 [file 9442234]
